# Supplementary material
Source: PubMed Central journal article supplement (PMC1464302)
Supplement: jphysiol_2005.096578_1.pdf [file jphysiol_2005.096578_1.pdf]

*JPHYSIOL/2005/096578*

*ii. Cell Physiology*

*Supplement*

**Long-QT syndrome related sodium channel mutations probed by  
dynamic action potential clamp technique**

*Running title:*

**SCN5A mutations probed by dAPC technique**

Géza Berecki<sup>1,2</sup>, Jan G. Zegers<sup>2</sup>, Zahurul A. Bhuiyan<sup>3</sup>, Arie O. Verkerk<sup>1,2</sup>, Ronald Wilders<sup>2</sup>,  
Antoni C.G. van Ginneken<sup>1,2</sup>

From the <sup>1</sup>Experimental and Molecular Cardiology Group and the Departments of <sup>2</sup>Physiology  
and <sup>3</sup>Clinical Genetics, Academic Medical Center, University of Amsterdam, The Netherlands.

Correspondence to G. Berecki, Department of Experimental Cardiology,  
Academic Medical Center, University of Amsterdam, Room M01-217, Meibergdreef 9,  
1105 AZ Amsterdam, PO Box 22700, 1100 DE Amsterdam, The Netherlands.  
Phone: +31-20-5667547; Fax: +31-20-6919319; E-mail: g.berecki@amc.uva.nl

Figure S1.

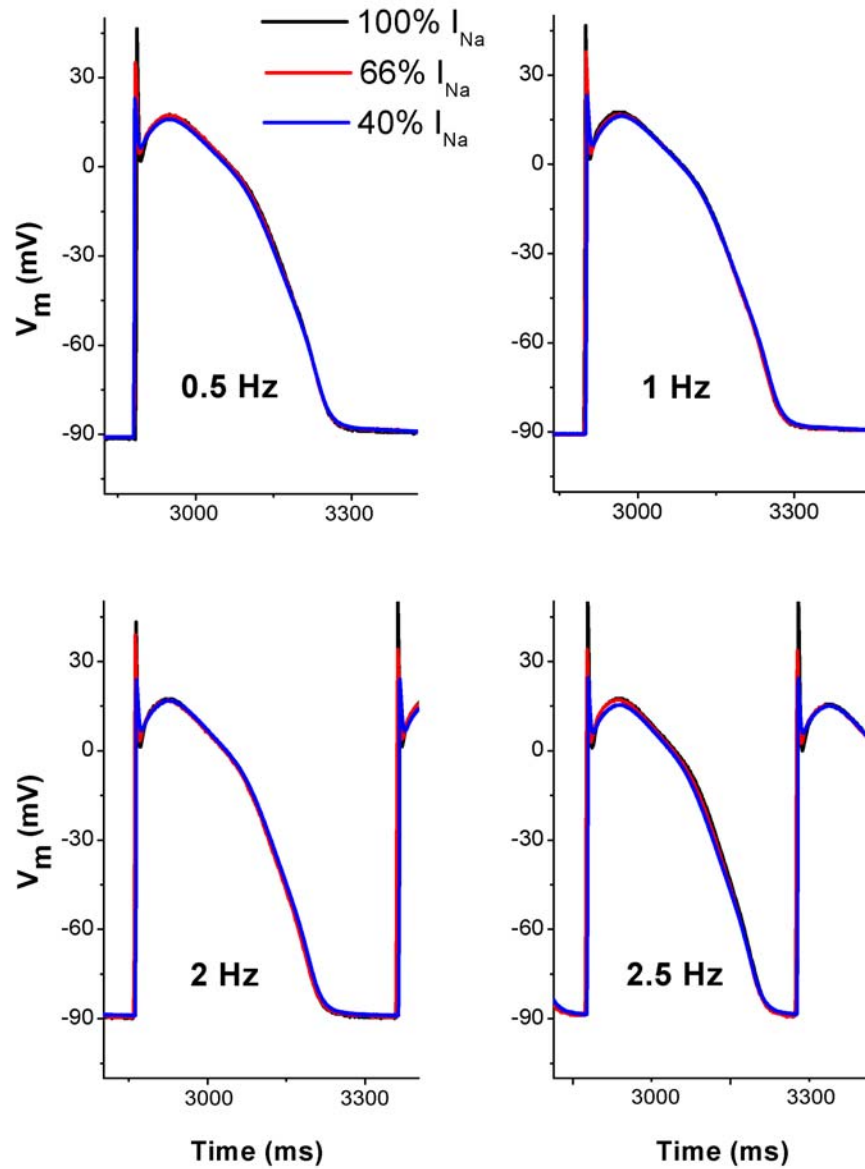

**Figure S1.** Effects of reducing model cell  $I_{Na}$  density on action potential duration (APD).  $I_{Na}$  reductions by 34 and 60% do not have APD-shortening effects at physiologically relevant stimulation rates.

Figure S2.

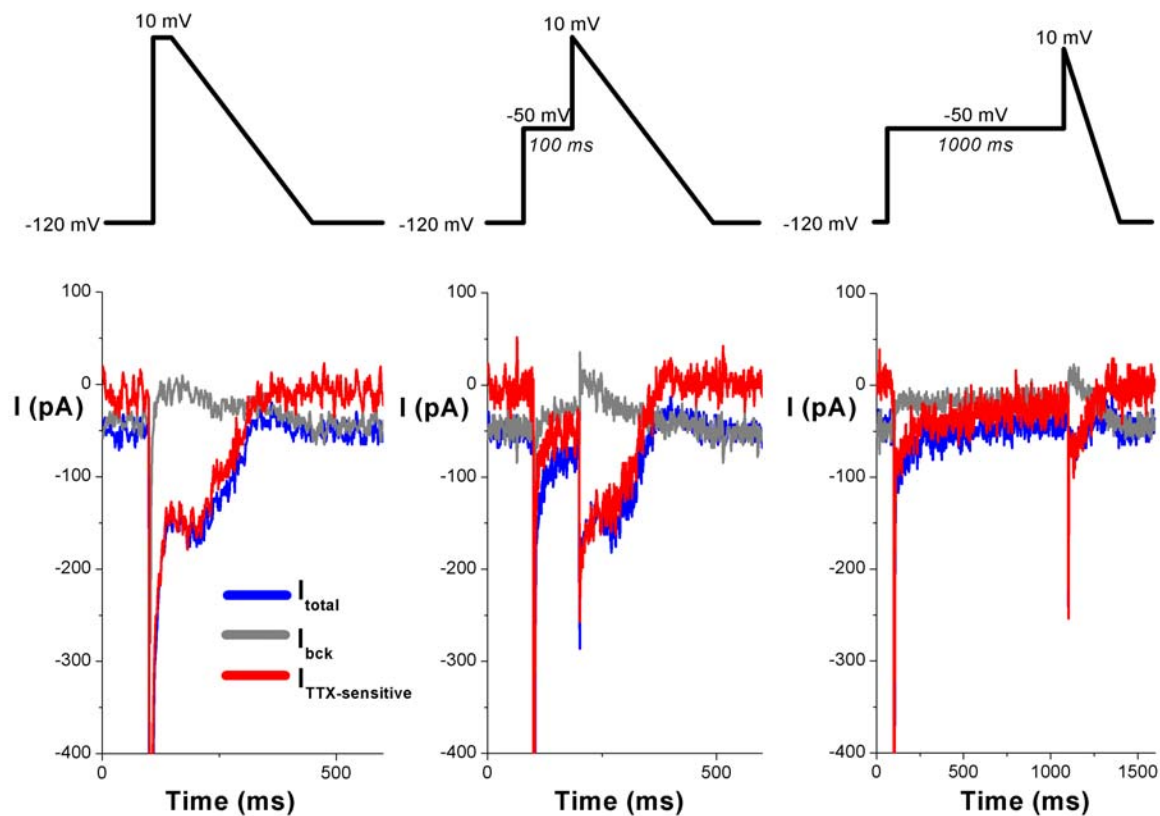

**Figure S2.** Magnitude of late  $I_{Na}$  during repolarising ramps depends on the duration of the depolarising voltage prepulse preceding the ramps. Note that a 1000-ms depolarising prepulse (right) almost fully inactivates  $I_{Na}$  (i.e. the TTX-sensitive current,  $I_{TTX-sensitive}$ ), while the step-ramp (left) allows defining  $I_{bck}$ -V relationships in (transfected) individual HEK-293 cells using  $I_{bck} = I_{total} - I_{TTX-sensitive}$  (see main text for details).

Figure S3.

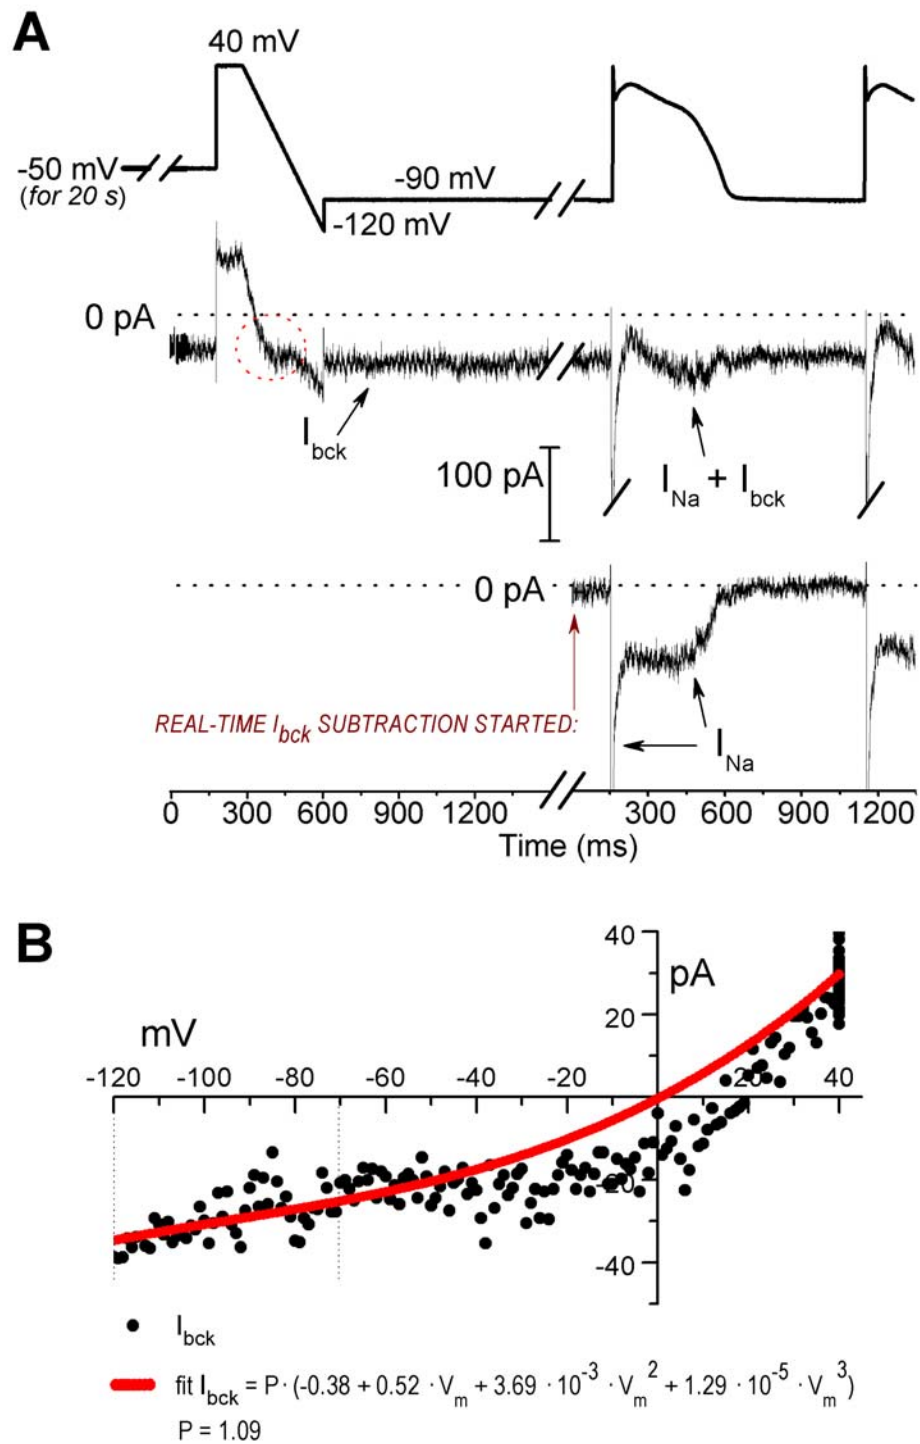

**Figure S3.** Real-time HEK-293 cell  $I_{bck}$  subtraction in a dAPC experiment, using Y1795C SCN5A cDNA-transfected HEK-293 cell. (A) Step-ramp voltage protocol to estimate  $I_{bck}$

followed by APs elicited in a subepicardial model cell (top); Middle:  $I_{Na}$  recorded in the presence of  $I_{bck}$  (arrow); Bottom: Y1795C  $I_{Na}$ , after  $I_{bck}$ -removal (the vertical arrow indicates the start of real-time  $I_{bck}$  subtraction). Note the massive late (Y1795C)  $I_{Na}$  during AP plateau and repolarization. Dotted line shows zero current level. (B) I-V relationship of HEK cell  $I_{bck}$  in the experiment shown in A, described by the third order polynomial equation with scaling factor P (fit  $I_{bck}$ ). Here, the 20-s long depolarizing prepulse-induced (Y1795C)  $I_{Na}$  inactivation was incomplete, as indicated by an inward “hump” current during the repolarising voltages (and by the dotted circle in A). To avoid any eventual contribution of late  $I_{Na}$  to  $I_{bck}$ , [equation 1](#) (bottom) was fitted only to the data points in the -120 to -70 mV range (between the dotted lines) (see main text for details).

Figure S4.

**Table S1.**

Relative densities of selected ionic currents in the subendocardial, midmyocardial (M), and subepicardial cell models.

| Current  | Subendocardial | M   | Subepicardial |
|----------|----------------|-----|---------------|
| $I_{to}$ | 25%            | 87% | 100%          |
| $I_{Ks}$ | 92%            | 46% | 100%          |
| $I_{K1}$ | 89%            | 74% | 100%          |

All densities are percentage relative to the standard densities in the PB model that essentially describes a human subepicardial ventricular myocyte (Berecki et al. 2005).

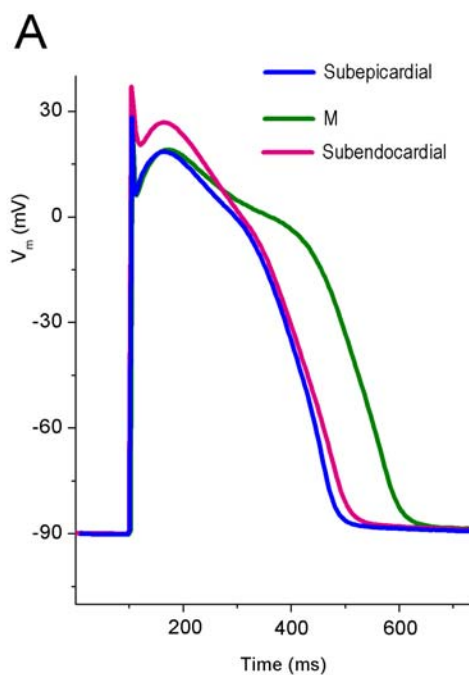

**B**

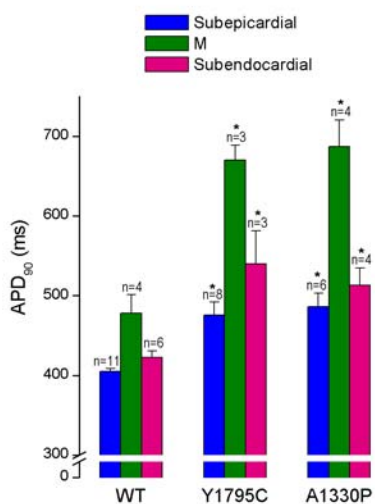

**C**

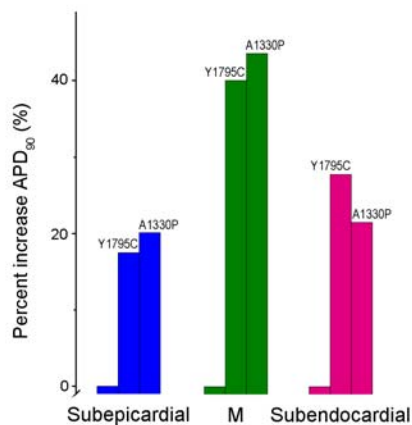

**Figure S4.** Regional AP heterogeneity and AP prolongation caused by LQT3 syndrome-related SCN5A mutations in dAPC experiments. (A) Subepicardial, midmyocardial (M), and

subendocardial APs were generated by adjusting selected membrane ionic currents in the Priebe & Beuckelmann (PB) model cell (Priebe & Beuckelmann, 1998) according to Table S1, and by implementing wild-type (WT) HEK-293 cell  $I_{Na}$  to the PB model cell. Stimulus rate was 1 Hz. (B) AP duration at 90% repolarisation ( $APD_{90}$ ) values obtained by implementing WT, Y1795C and A1330P HEK cell  $I_{Na}$  to the subepicardial, M, or subendocardial PB model cells, at 1 Hz. Asterisks indicate significant difference versus control ( $P < 0.05$  for mutant *versus* WT). (C) M cells exhibit a larger increase in  $APD_{90}$  with Y1795C and A1330P mutants compared to subepicardial or subendocardial cells. Mean  $APD_{90}$  values were normalised for WT  $APD_{90}$  within a cell type using data from B. The results are consistent with the decreased repolarising current densities of subendocardial and M cells (Table S1).

## References

Berecki G, Zegers JG, Verkerk AO, Bhuiyan ZA, de Jonge B, Veldkamp MW, Wilders R & van Ginneken AC (2005). HERG channel (dys)function revealed by dynamic action potential clamp technique. *Biophys J* **88**, 566-578.

Priebe L & Beuckelmann DJ (1998). Simulation study of cellular electric properties in heart failure. *Circ Res* **82**, 1206-1223.
